# Supplementary material
Source: MDPI journal article supplement (https://www.mdpi.com/2313-0105/9/1/59)
Supplement: s1 [file s1]

# Supporting information

## NASICON-type $\text{Li}_{1+x}\text{Al}_x\text{Zr}_y\text{Ti}_{2-x-y}(\text{PO}_4)_3$ solid electrolytes: effect of Al, Zr co-doping and synthesis method

Irina Stenina \*, Anastasia Pyrkova and Andrey Yaroslavtsev

Kurnakov Institute of General and Inorganic Chemistry, Russian Academy of Sciences, Leninsky prospekt 31, Moscow 119991, Russia;  
ab.bocharova@mail.ru (A.P.); yaroslav@igic.ras.ru (A.Y.)

\* Correspondence: stenina@igic.ras.ru, Tel.: +7(495)7756585

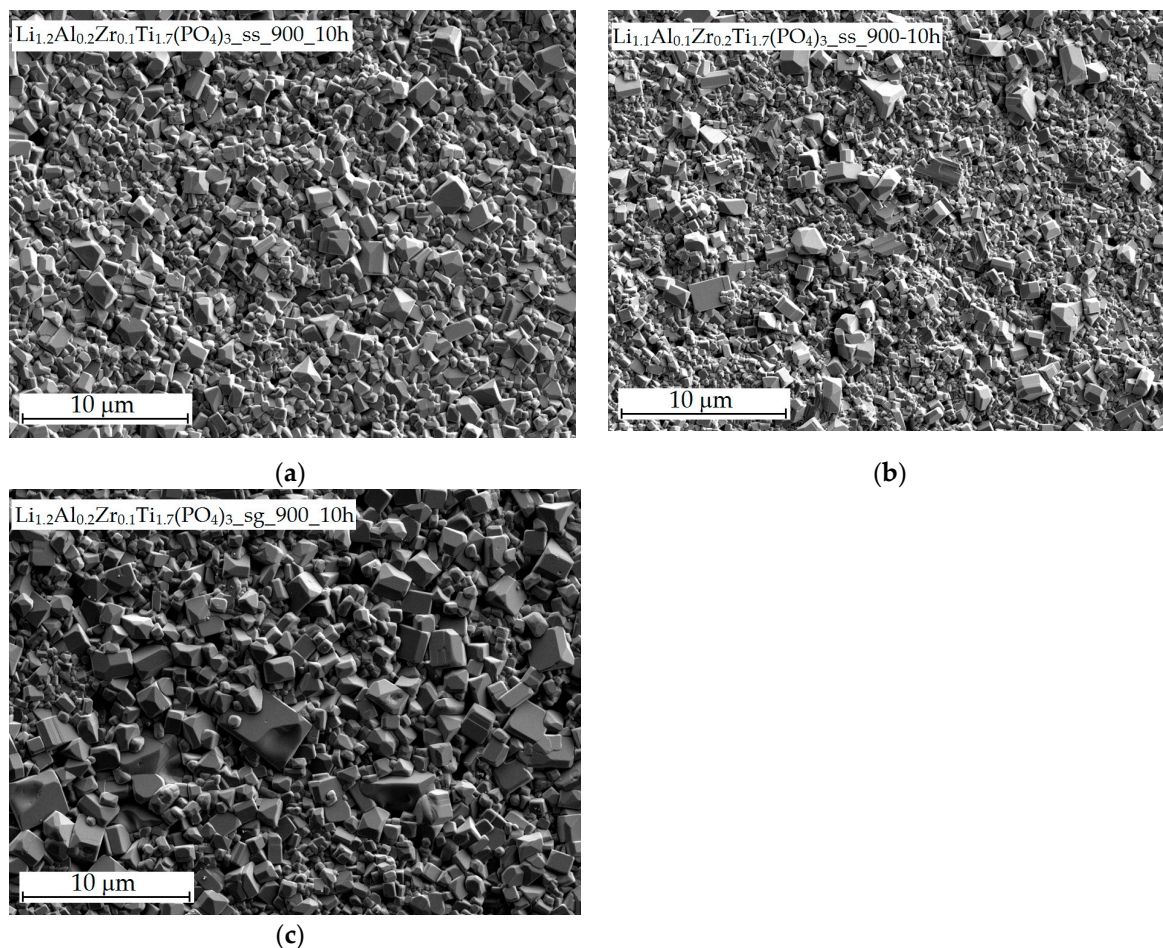

**Figure S1.** SEM images of surfaces of  $\text{Li}_{1.2}\text{Al}_{0.2}\text{Zr}_{0.1}\text{Ti}_{1.7}(\text{PO}_4)_3$ \_ss\_900-10h (a),  $\text{Li}_{1.1}\text{Al}_{0.1}\text{Zr}_{0.2}\text{Ti}_{1.7}(\text{PO}_4)_3$ \_ss\_900-10h (b),  $\text{Li}_{1.2}\text{Al}_{0.2}\text{Zr}_{0.1}\text{Ti}_{1.7}(\text{PO}_4)_3$ \_sg\_900-10h (c).

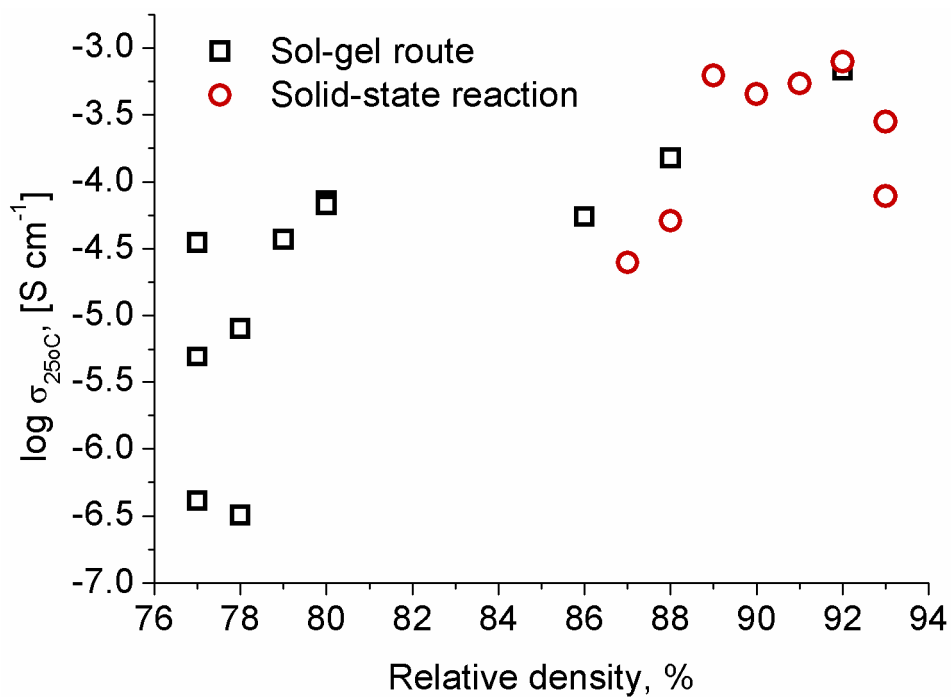

**Figure S2.** The dependence of the total conductivity at 25 °C on relative density for the  $\text{Li}_{1+x}\text{Al}_x\text{Zr}_y\text{Ti}_{2-x-y}(\text{PO}_4)_3$  ( $0 \leq x, y \leq 0.2$ ) samples.

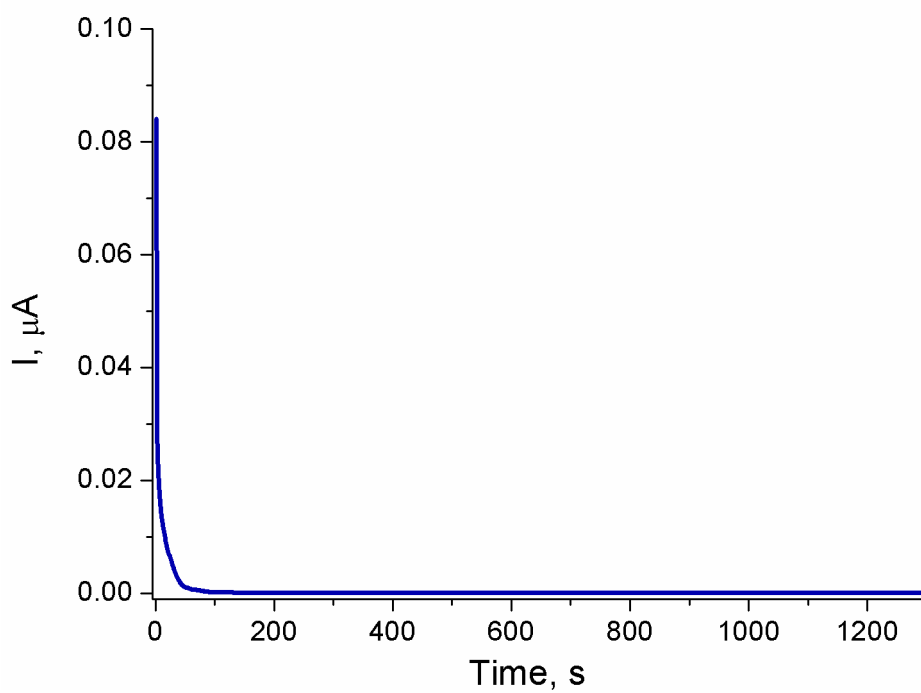

**Figure S3.** The dependence of polarization current on time for the  $\text{Li}_{1.2}\text{Al}_{0.2}\text{Zr}_{0.1}\text{Ti}_{1.7}(\text{PO}_4)_3_{\text{ss\_900-10h}}$  sample.
